# Supplementary material for: Generating realistic null hypothesis of cancer mutational landscapes using SigProfilerSimulator
Source: PubMed Central journal article supplement (PMC7539472; doi:10.1186/s12859-020-03772-3), 2020-10-07

**PD6413a  
Breast cancer**

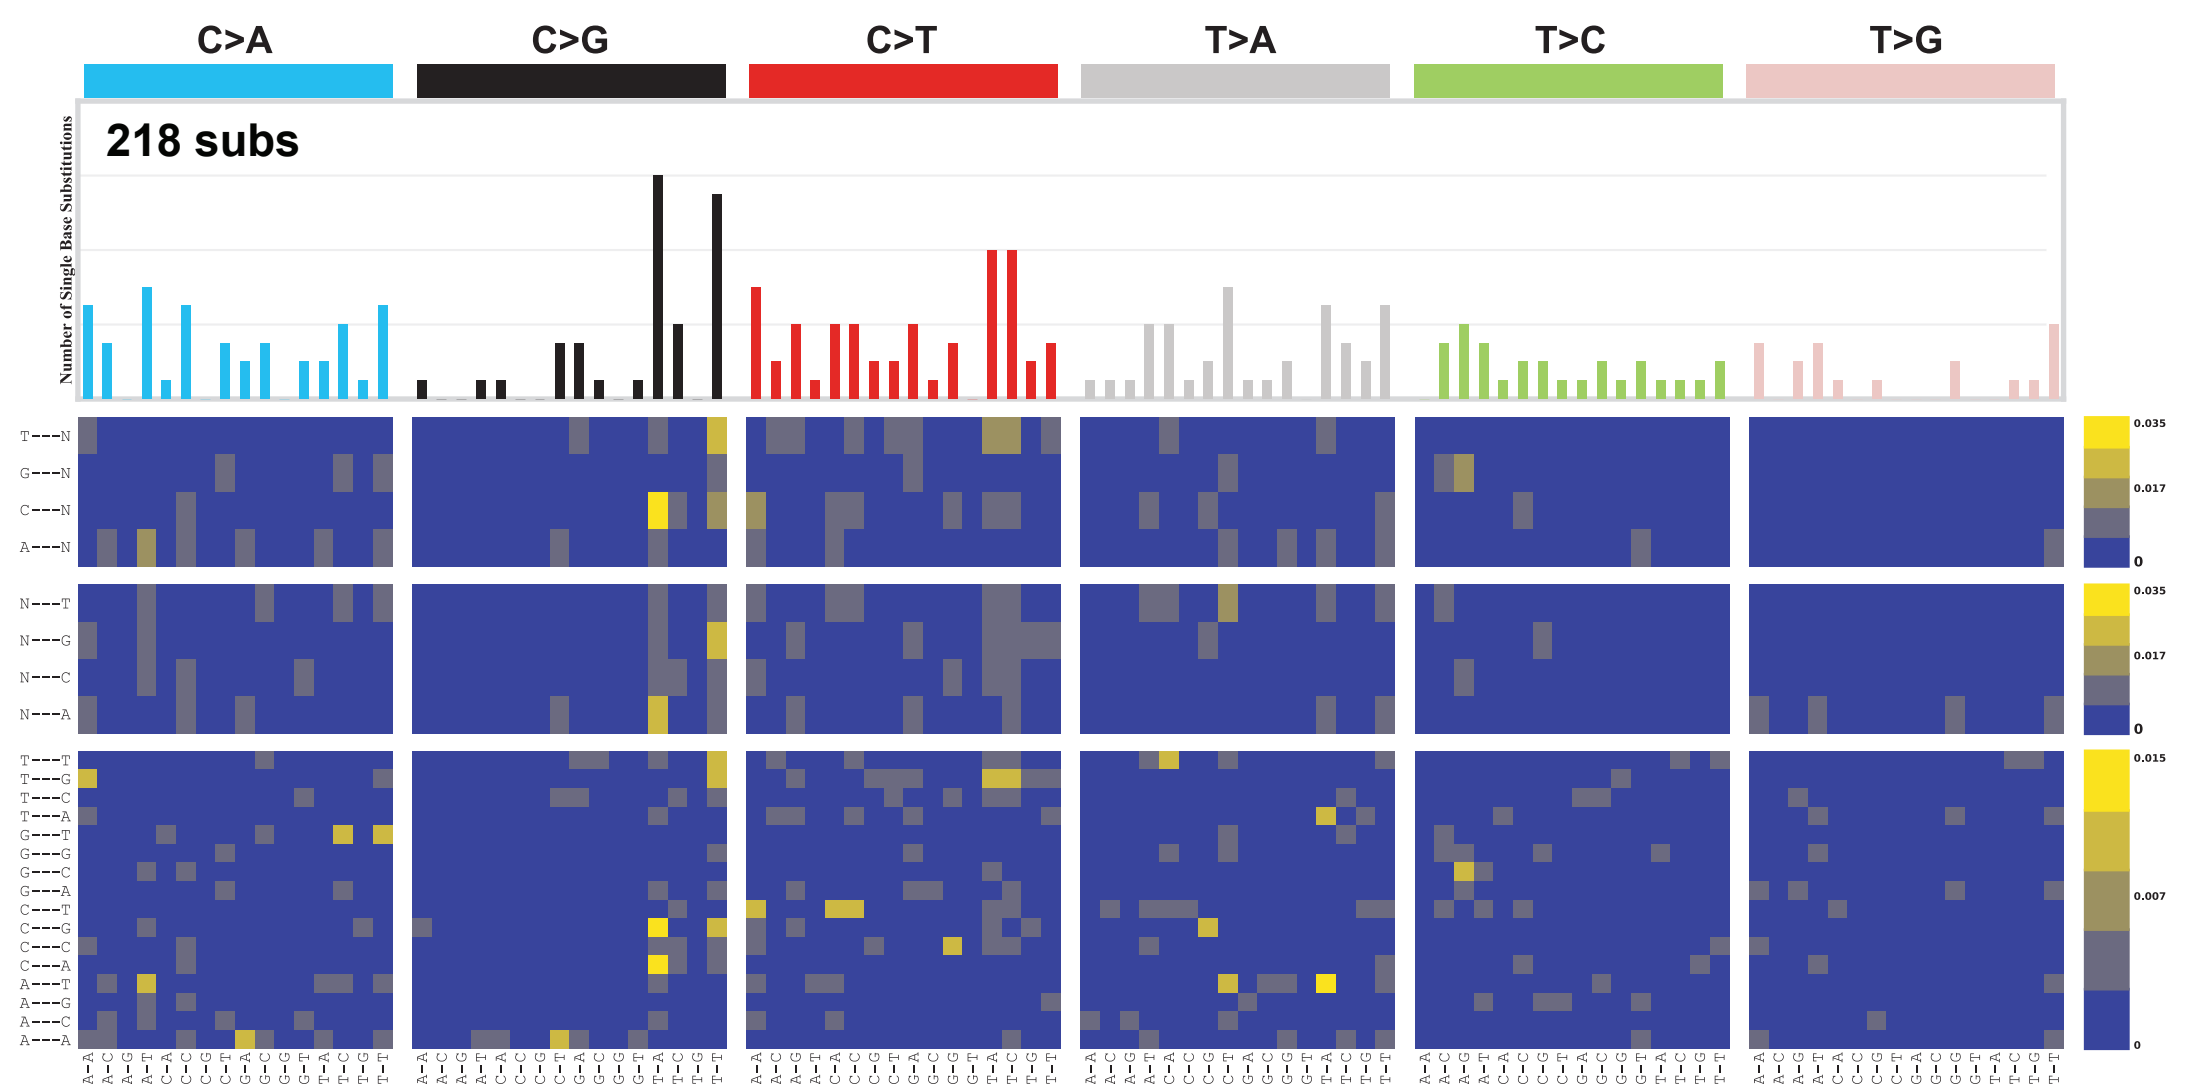

**Simulated SBS-1536**

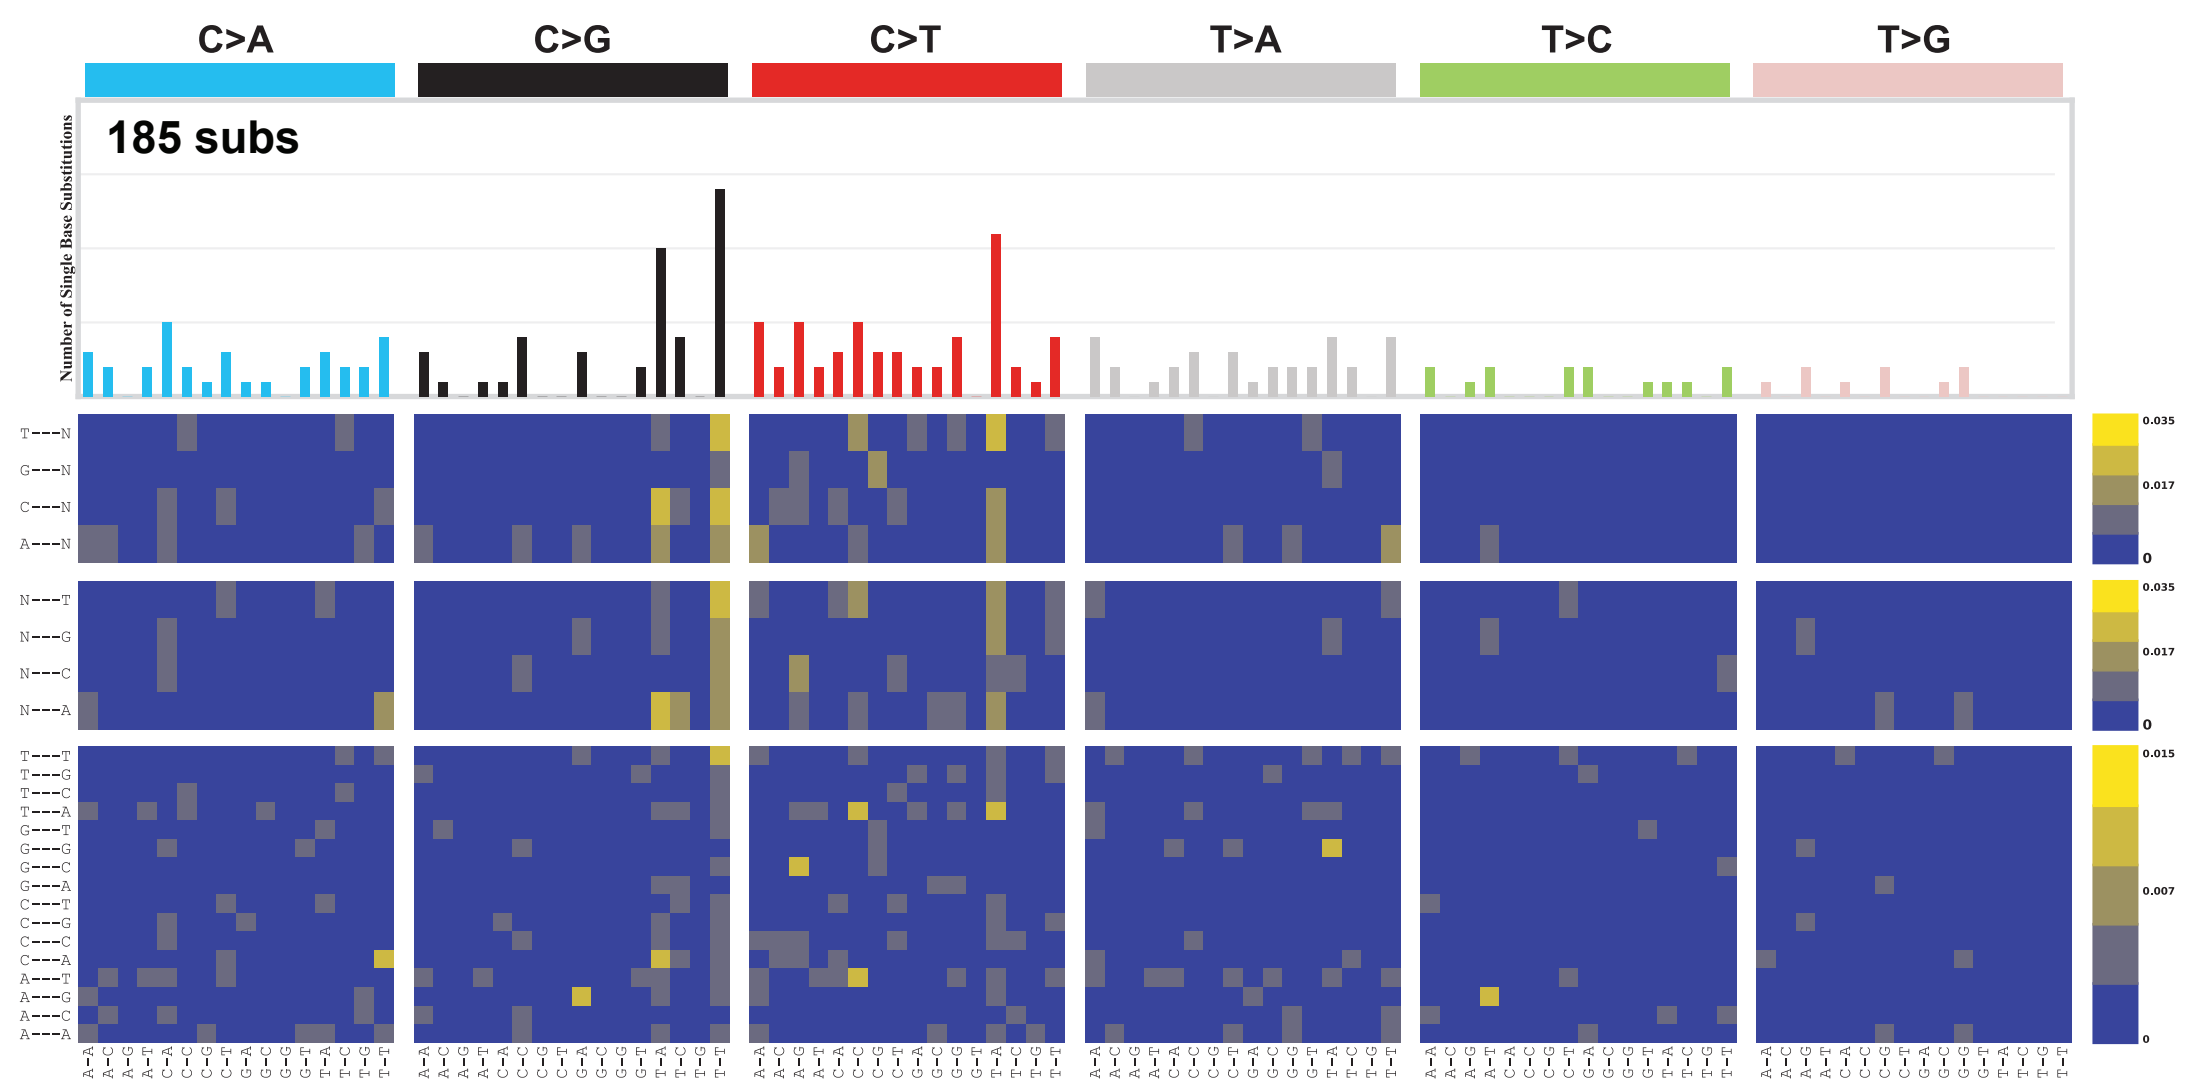

**Simulated SBS-1536  
per chromosome**

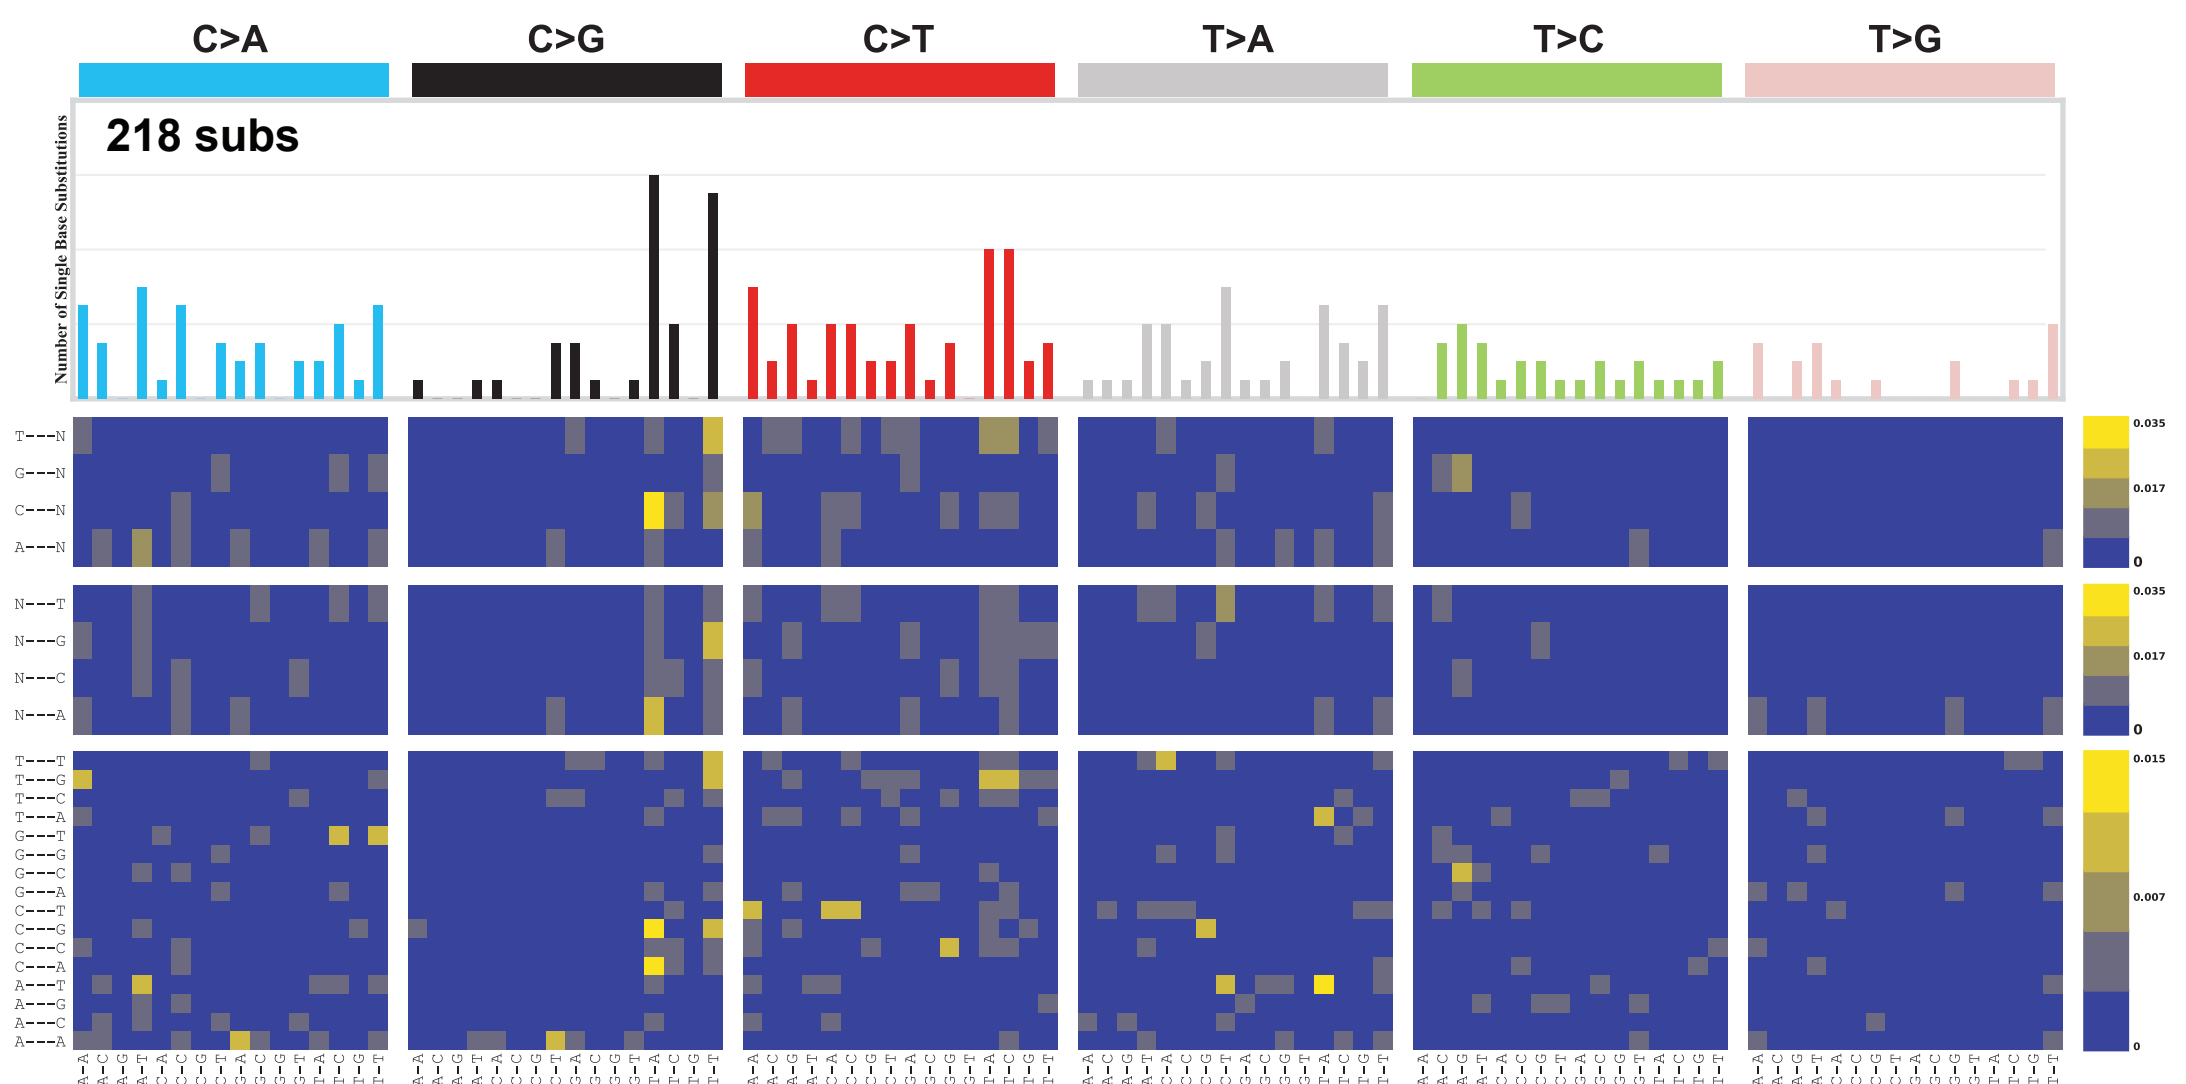

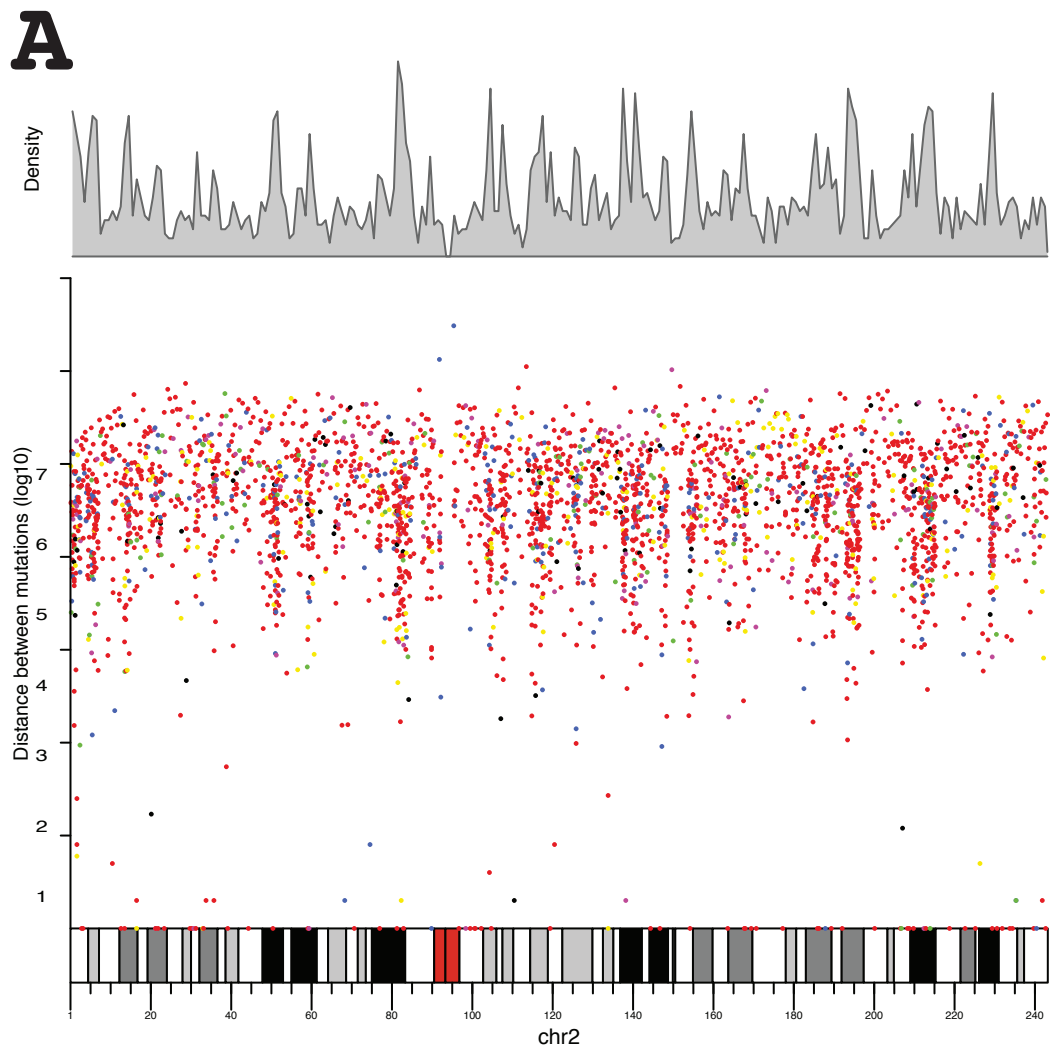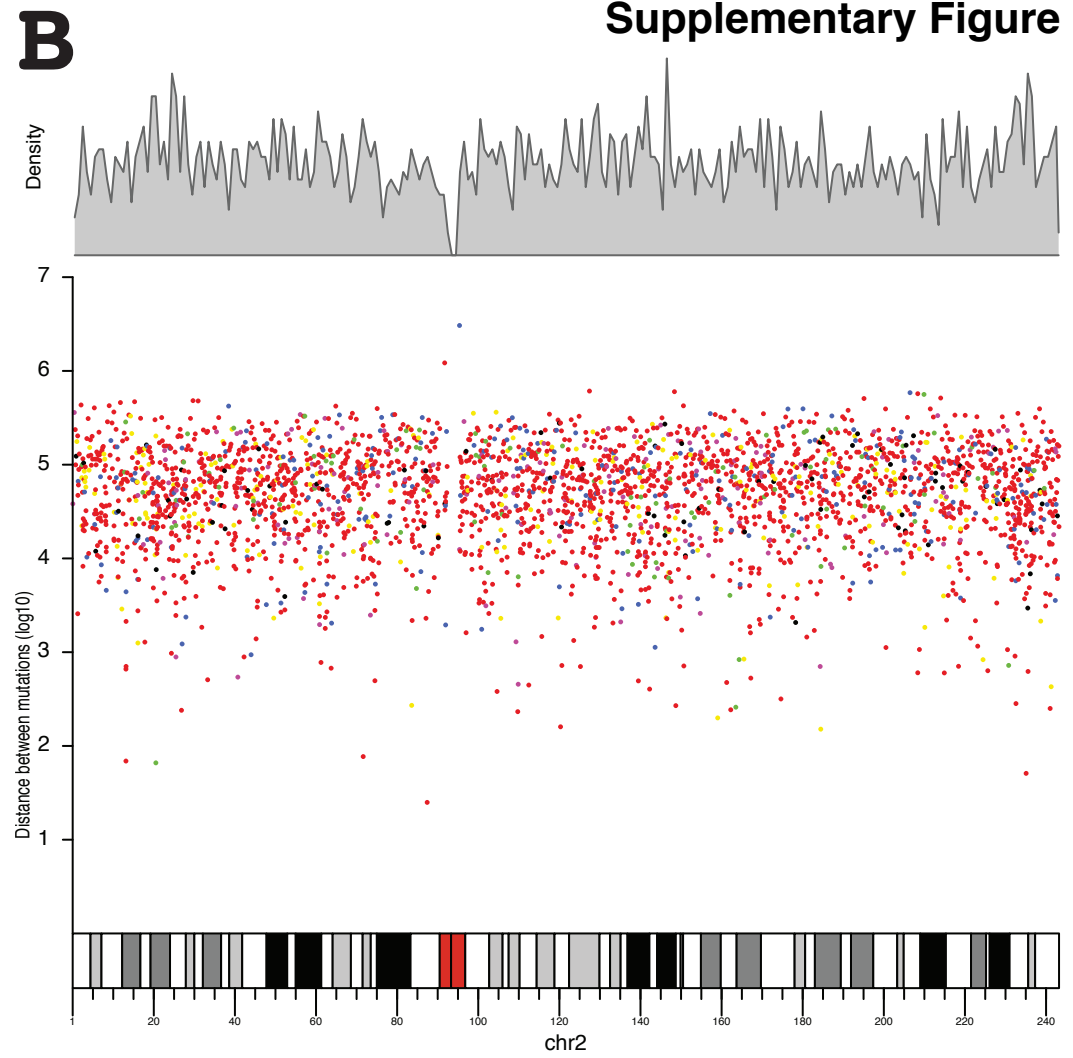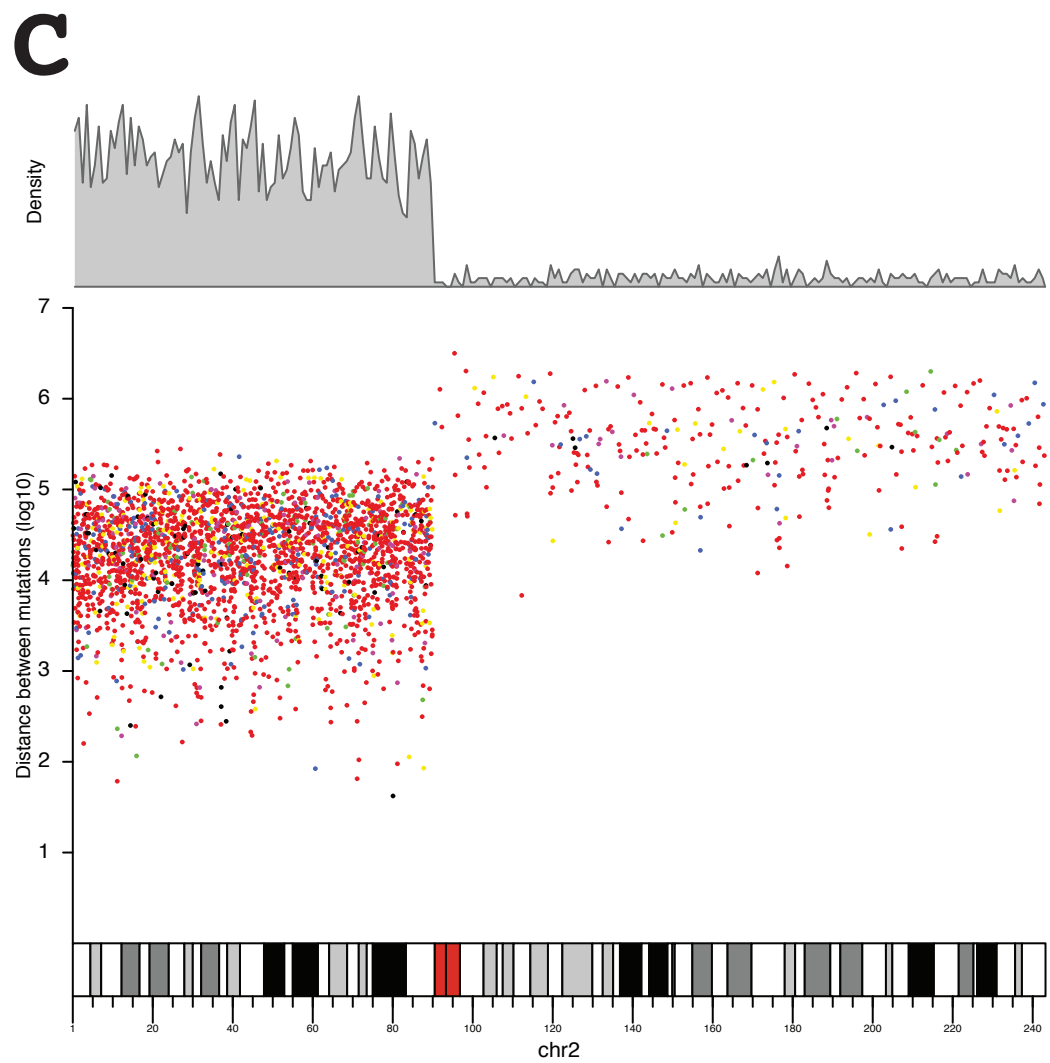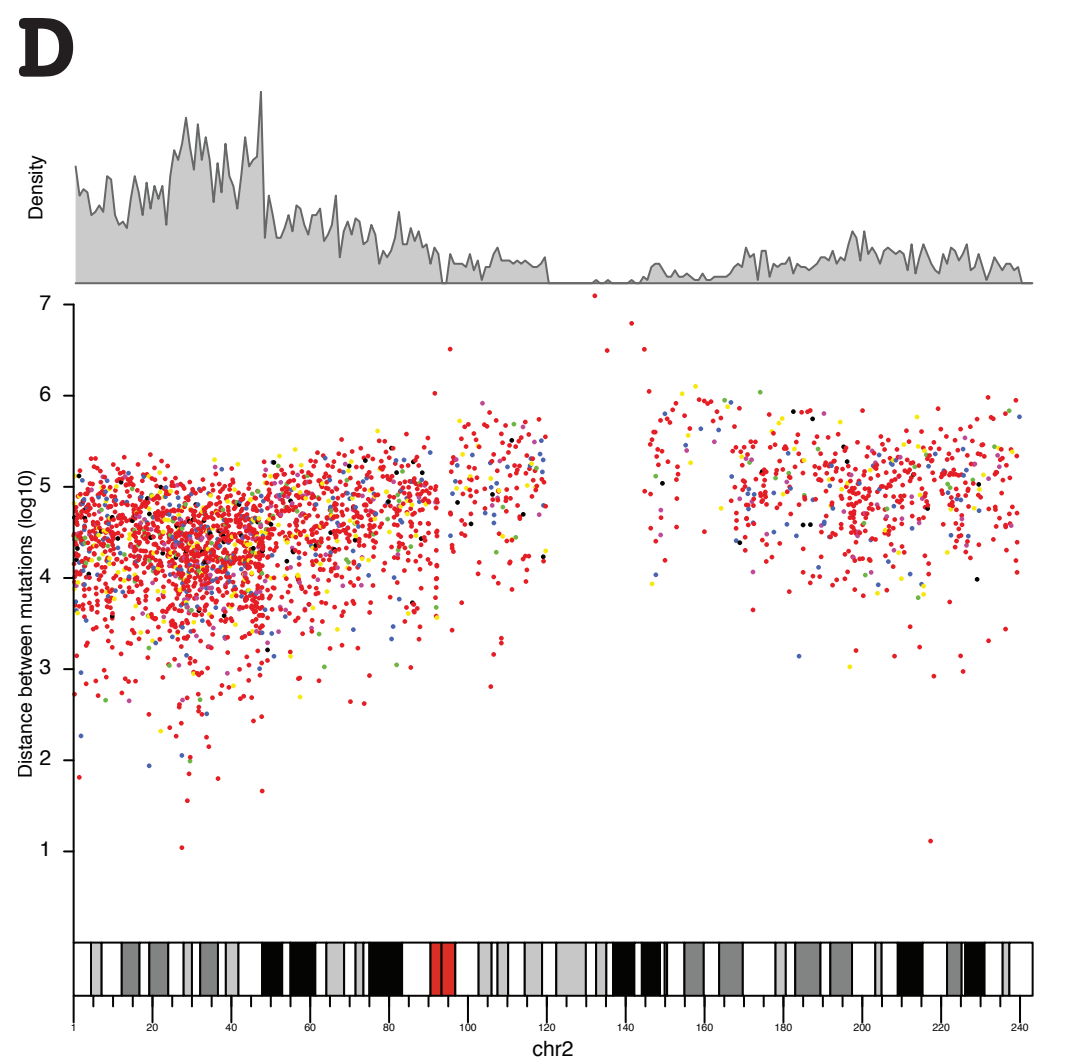

Fold increase of DBSs across different cancer types (Updating)

Supplementary Figure 3

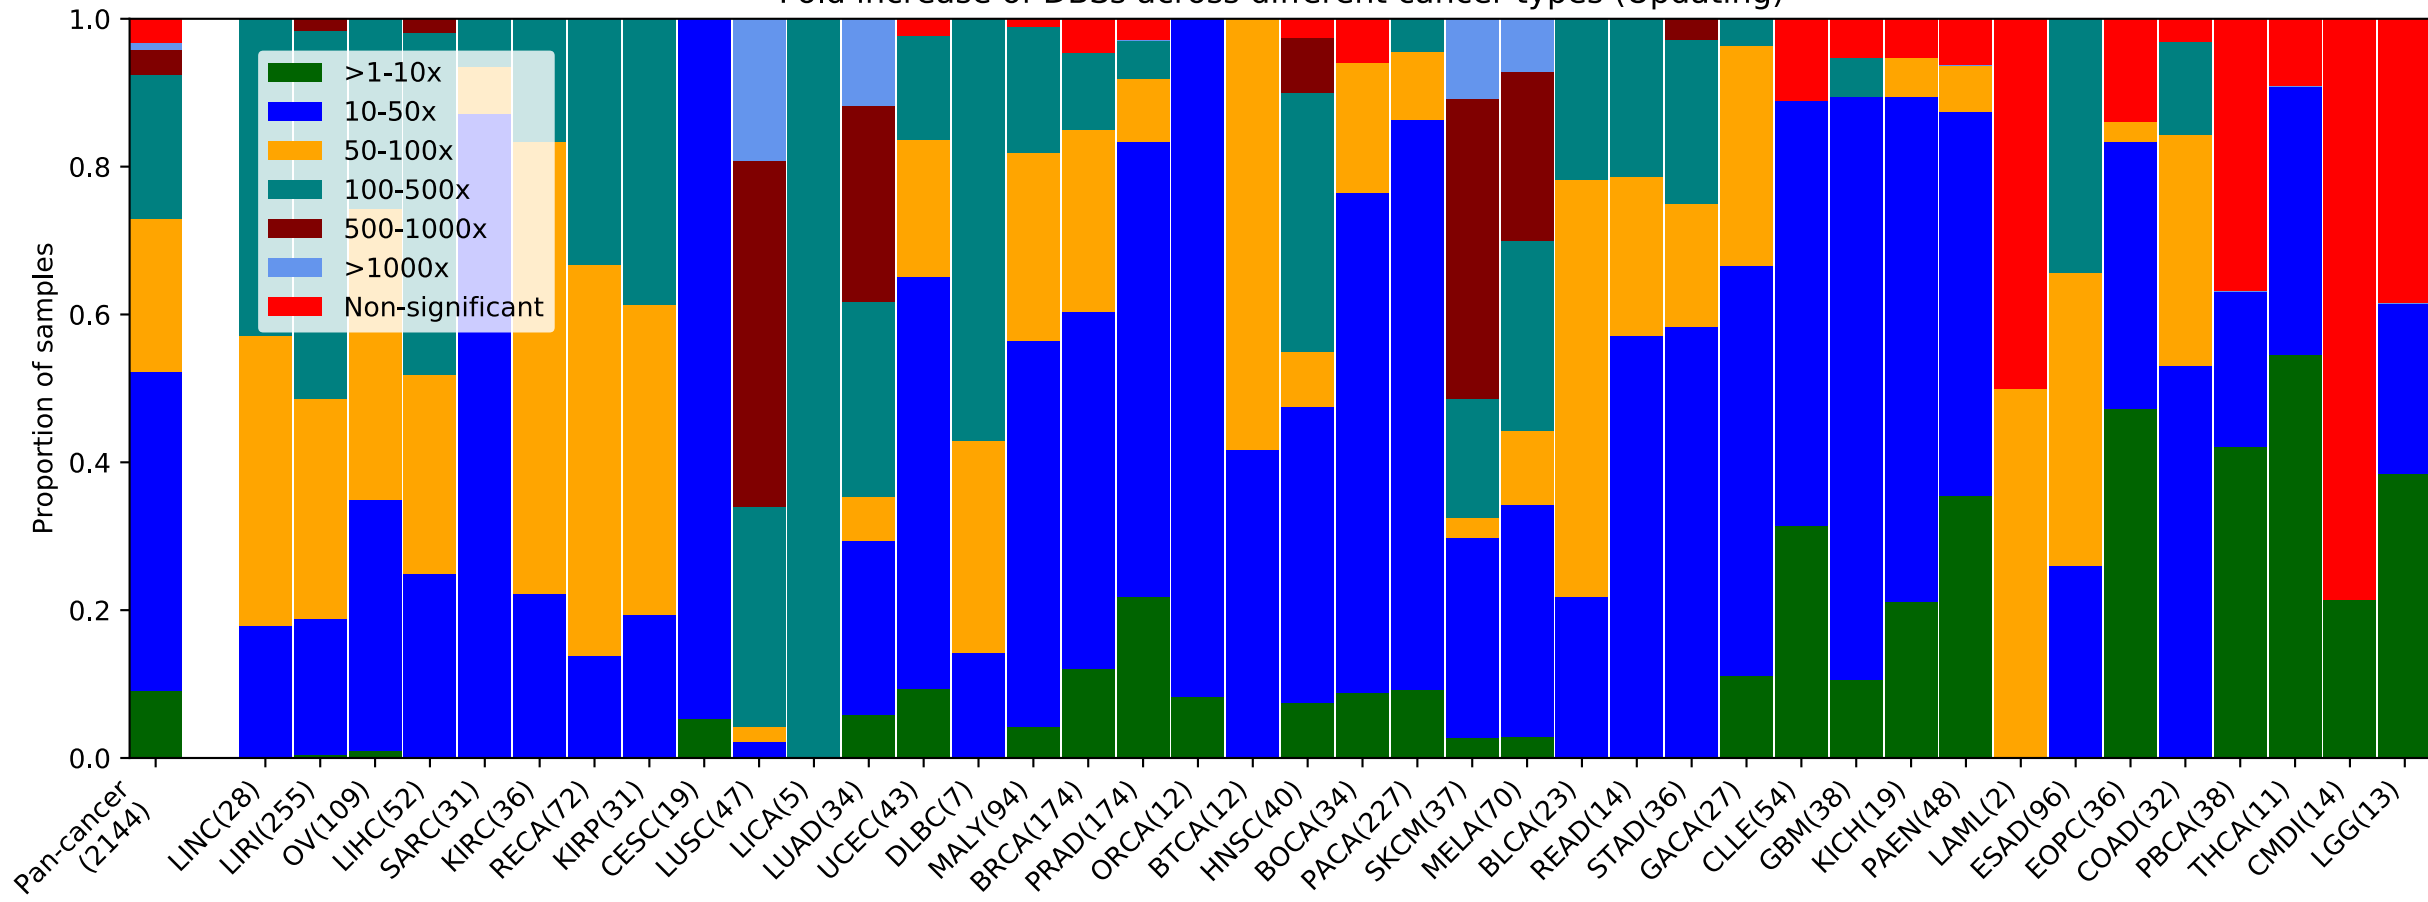

**A**

Similarity of +/-2bp (SBS-1536) between  
randomly generated vectors

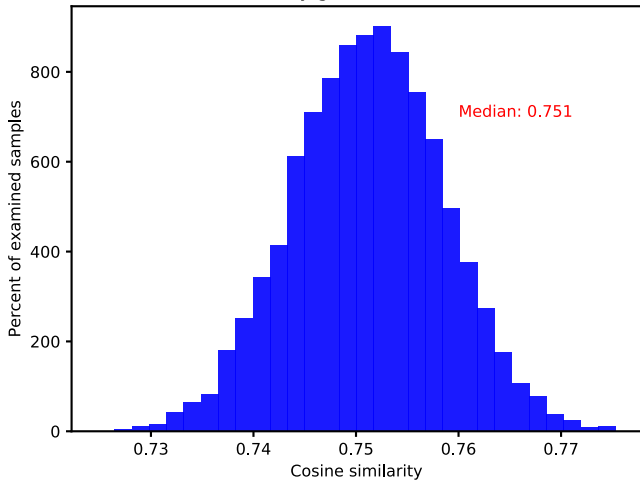**B****Supplementary Figure 4**

Similarity of +/-3bp (SBS-24576) between  
randomly generated vectors

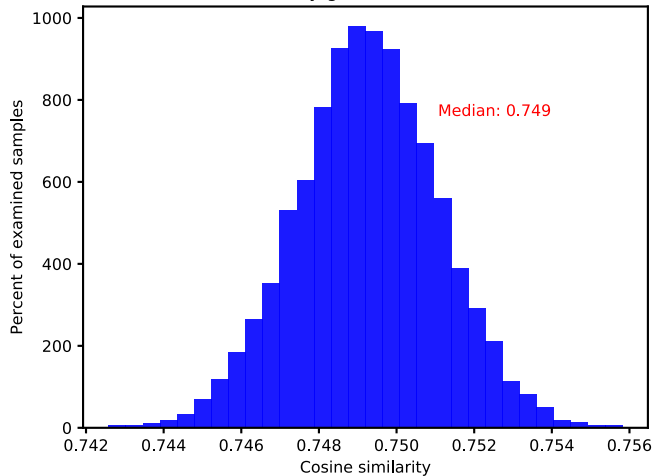

Supplement: 12859_2020_3772_MOESM1_ESM.pdf [file 12859_2020_3772_MOESM1_ESM.pdf]
